# Supplementary material
Source: bioRxiv or medRxiv preprint supplement (https://www.biorxiv.org/highwire/filestream/134117/field_highwire_adjunct_files/15/444521-9.pdf)
Supplement: Supplementary file [file 444521-9.pdf]

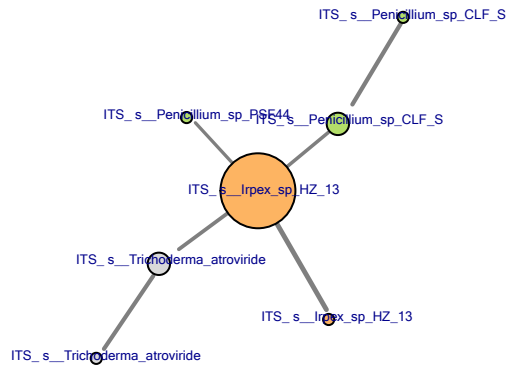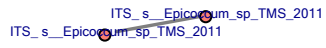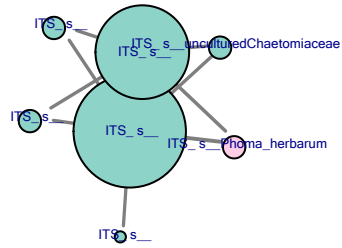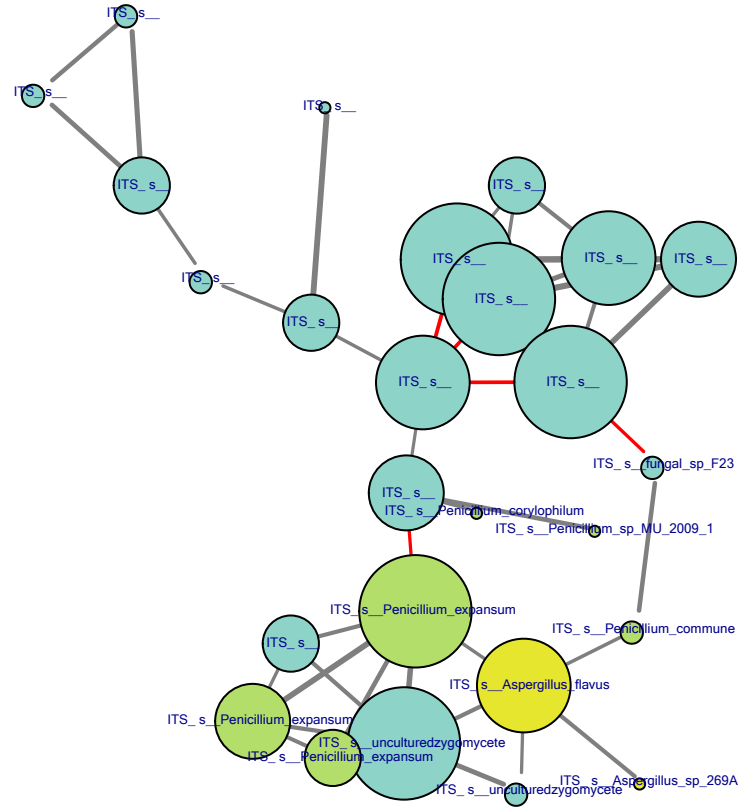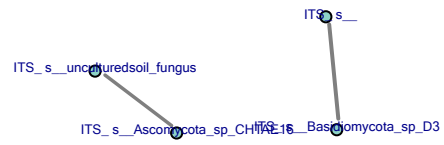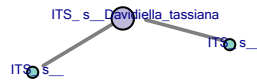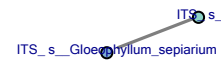

- ITS\_g\_Unkown
- ITS\_g\_Aspergillus
- ITS\_g\_Davidiella
- ITS\_g\_Epicoccum
- ITS\_g\_Gloeophyllum
- ITS\_g\_Irpex
- ITS\_g\_Penicillium
- ITS\_g\_Phoma
- ITS\_g\_Trichoderma
